# Supplementary material for: Ingenious microenvironment regulation of a metal–organic framework (MOF) nanoreactor for electrochemical detection of chlorogenic acid
Source: Royal Society of Chemistry journal article supplement (doi:10.1039/d3nj05061k), 2024-01-01
Supplement: d3nj05061k1.pdf [file d3nj05061k1.pdf]

## Supporting Information

### **Ingenious microenvironment regulation of metal-organic framework (MOF) nanoreactor for electrochemical detection of chlorogenic acid**

Junfeng Wang,<sup>a</sup> Shua pan,<sup>a</sup> Wang Sun<sup>b</sup> and Yang Wang<sup>\*b</sup>

<sup>a</sup> Department of Otolaryngology & Head and Neck Surgery, Affiliated Hospital of Yangzhou University, Yangzhou, China.

<sup>b</sup> School of Chemistry and Chemical Engineering, Yangzhou University, Yangzhou 225002, People's Republic of China.

\* Corresponding authors: wangyzu@126.com (Y. Wang)

## Content

|                                                                                                           |   |
|-----------------------------------------------------------------------------------------------------------|---|
| Symbol.....                                                                                               | 3 |
| Fig. S1 TEM images of unreduced Au/PcFe@HZIF-8 (A), Au/PcFe@HZIF-8 (B) and EDX of Au/PcFe@HZIF-8 (C)..... | 4 |
| Fig. S2 Raman spectra of ZIF-8 (a), PcFe@ZIF-8 (b) and Au/PcFe@HZIF-8 (c).....                            | 5 |
| Fig. S3 XPS analysis of survey spectrum (A), Au 4f-Zn 3p (B) and Fe 2p (C) of Au/PcFe@HZIF-8. ....        | 6 |
| Fig. S4 Schematic diagram of chlorogenic acid reaction mechanism.....                                     | 7 |
| References .....                                                                                          | 8 |

## Symbol

The electroactive effective surface area ( $A_e$ ) was calculated according to the Randle Sevcik equation (1):

$$I_p = (2.69 \times 10^5) n^{3/2} D^{1/2} v^{1/2} AC \quad (1)$$

where  $I_p$ ,  $n$ ,  $D$ ,  $v$  and  $C$  represent the peak current, the number of transferred electrons, the diffusion coefficient (ferricyanide), scan rate and the concentration of the redox probe.<sup>S1</sup> Thus, the electroactive effective surface area of GCE, ZIF-8/GCE, PcFe@ZIF-8/GCE and Au/PcFe@HZIF-8/GCE were 0.043, 0.101, 0.124, and 0.169 cm<sup>2</sup>, respectively.

The diffusion coefficient of CGA was calculated to be  $8.43 \times 10^{-6}$  cm<sup>2</sup> s<sup>-1</sup> based on the simplified Randles-Sevcik equation (2) and (3).

$$I_p = kn^{3/2} A \sqrt{Dv} C \quad (2)$$
$$D = \frac{\left(\frac{I_p}{\sqrt{v}}\right)^2}{k^2 \times n^3 \times A^2 \times C^2} = \frac{\text{Slope}^2}{k^2 \times n^3 \times A^2 \times C^2} \quad (3)$$

$k$  is a constant of  $2.69 \times 10^5$  (C mol<sup>-1</sup> V<sup>-1/2</sup>),  $n$  is the number of electrons transferred during the redox event,  $A$  is effective surface area of electrode (cm<sup>2</sup>),  $D$  is the diffusion coefficient of the analyte (cm<sup>2</sup> s<sup>-1</sup>),  $C$  is the analyte concentration and  $v$  is the scan rate.<sup>S2</sup>

The standard heterogeneous electron transfer rate constant ( $K_s$ ) was calculated to be  $7.81 \times 10^{-3}$  cm s<sup>-1</sup> based on the equation (4).<sup>S3</sup>

$$\log K_s = -0.48\alpha + 0.52 + \log \left[ \frac{nF\alpha V_c D}{2.303RT} \right]^{1/2} \quad (4)$$

The Gileadi method (equation 2) was used to calculate the heterogeneous electron transfer rate constant ( $K_s$ ) (cm s<sup>-1</sup>),  $\alpha$  is 0.5,  $n$  is 2,  $F$  is the Faraday constant (C mol<sup>-1</sup>),  $V_c$  is the scan rate (V s<sup>-1</sup>),  $D$  is the diffusion coefficient (cm<sup>2</sup> s<sup>-1</sup>),  $R$  is the gas constant of 8.314 (J K<sup>-1</sup> mol<sup>-1</sup>),  $T$  is the room temperature (298 K).

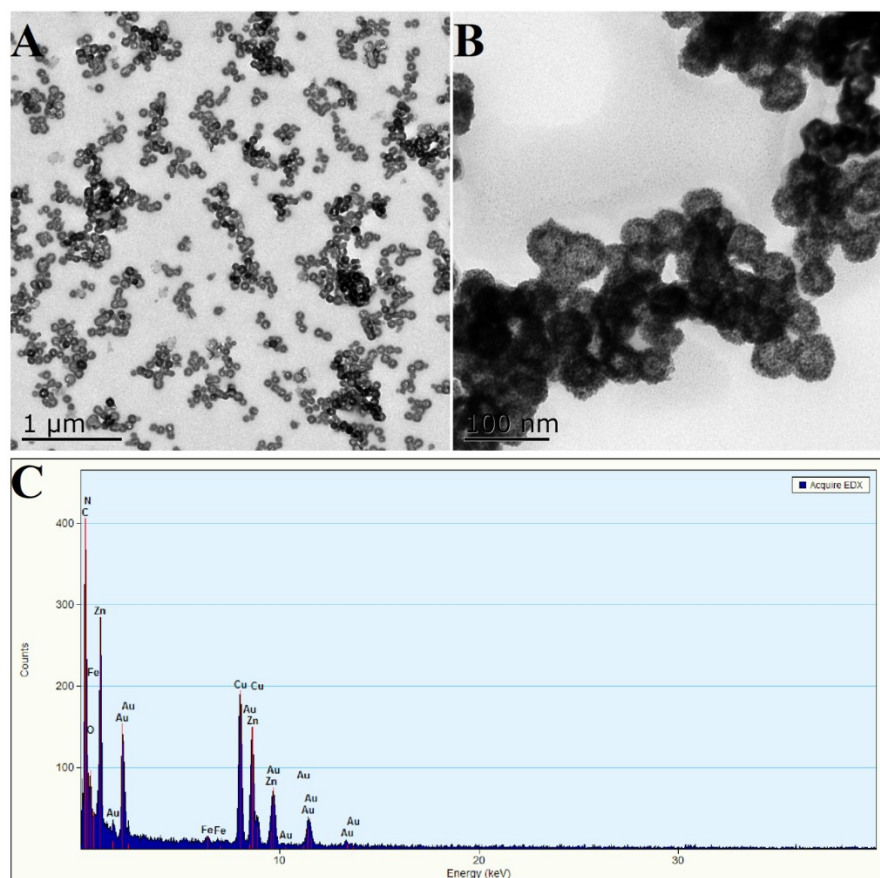

**Fig. S1** TEM images of unreduced Au/PcFe@HZIF-8 (A), Au/PcFe@HZIF-8 (B) and EDX of Au/PcFe@HZIF-8 (C).

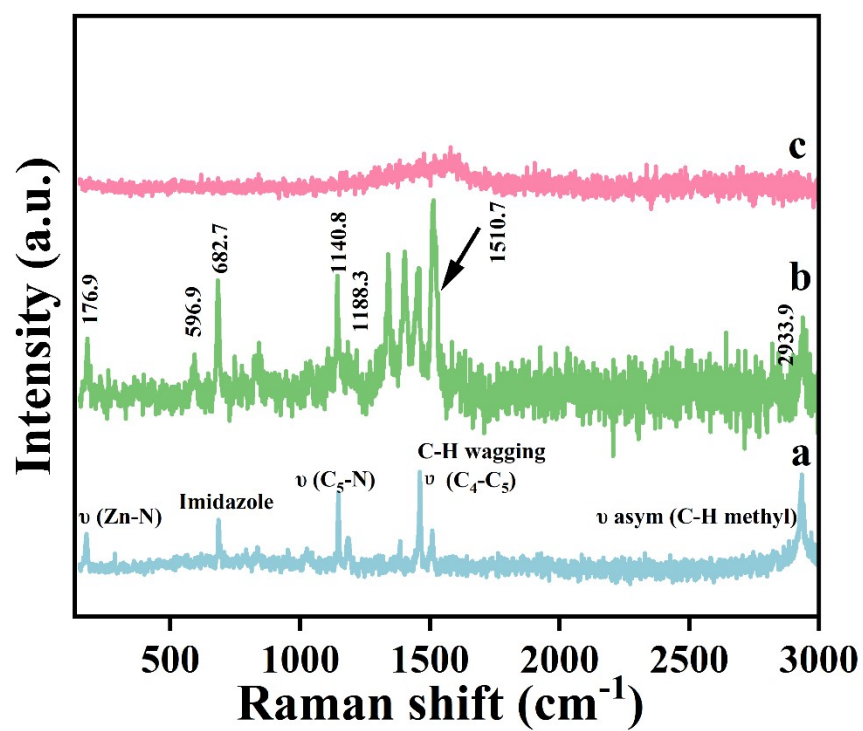

**Fig. S2** Raman spectra of ZIF-8 (a), PcFe@ZIF-8 (b) and Au/PcFe@HZIF-8 (c).

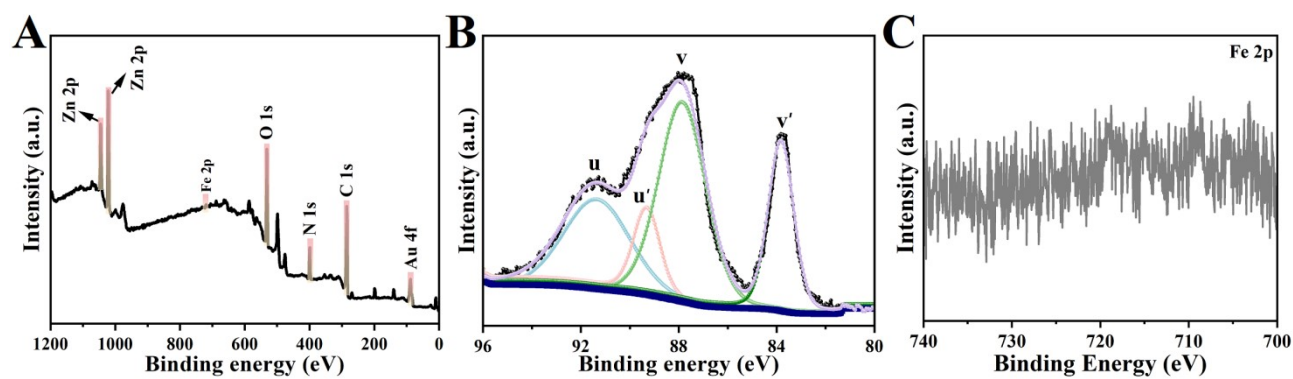

**Fig. S3** XPS analysis of survey spectrum (A), Au 4f-Zn 3p (B) and Fe 2p (C) of Au/PcFe@HZIF-8.

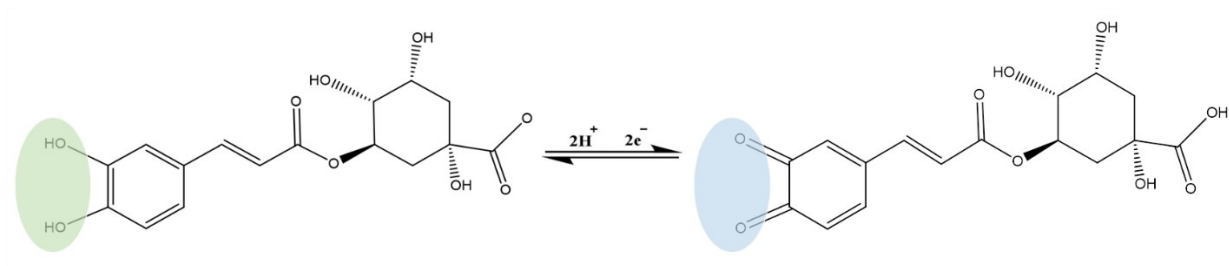

**Fig. S4** Schematic diagram of chlorogenic acid reaction mechanism.

## References

- S1 G. K. Jayaprakash, B. E. Kumara Swamy, S. Rajendrachari and S. C. Sharma, *J. Mol. Liq.*, 2021, **334**, 116348.
- S2 A. J. Bard and L. R. Faulkner, *Electrochemical Methods: Fundamentals and Applications*, Wiley, New York, 2001.
- S3 H. Muhammad, I. A. Tahiri, M. Muhammad, Z. Masood, M. A. Versiani, O. Khaliq, M. Latif, M. Hanif, *J. Electroanal. Chem.*, 2016, **775**, 157-162.
